# Supplementary figures and images for: Effect of Sarcopenia on Mortality in Type 2 Diabetes: A Long-Term Follow-Up Propensity Score-Matched Diabetes Cohort Study
Source: MDPI journal article supplement (doi:10.3390/jcm11154424), 2022-07-29

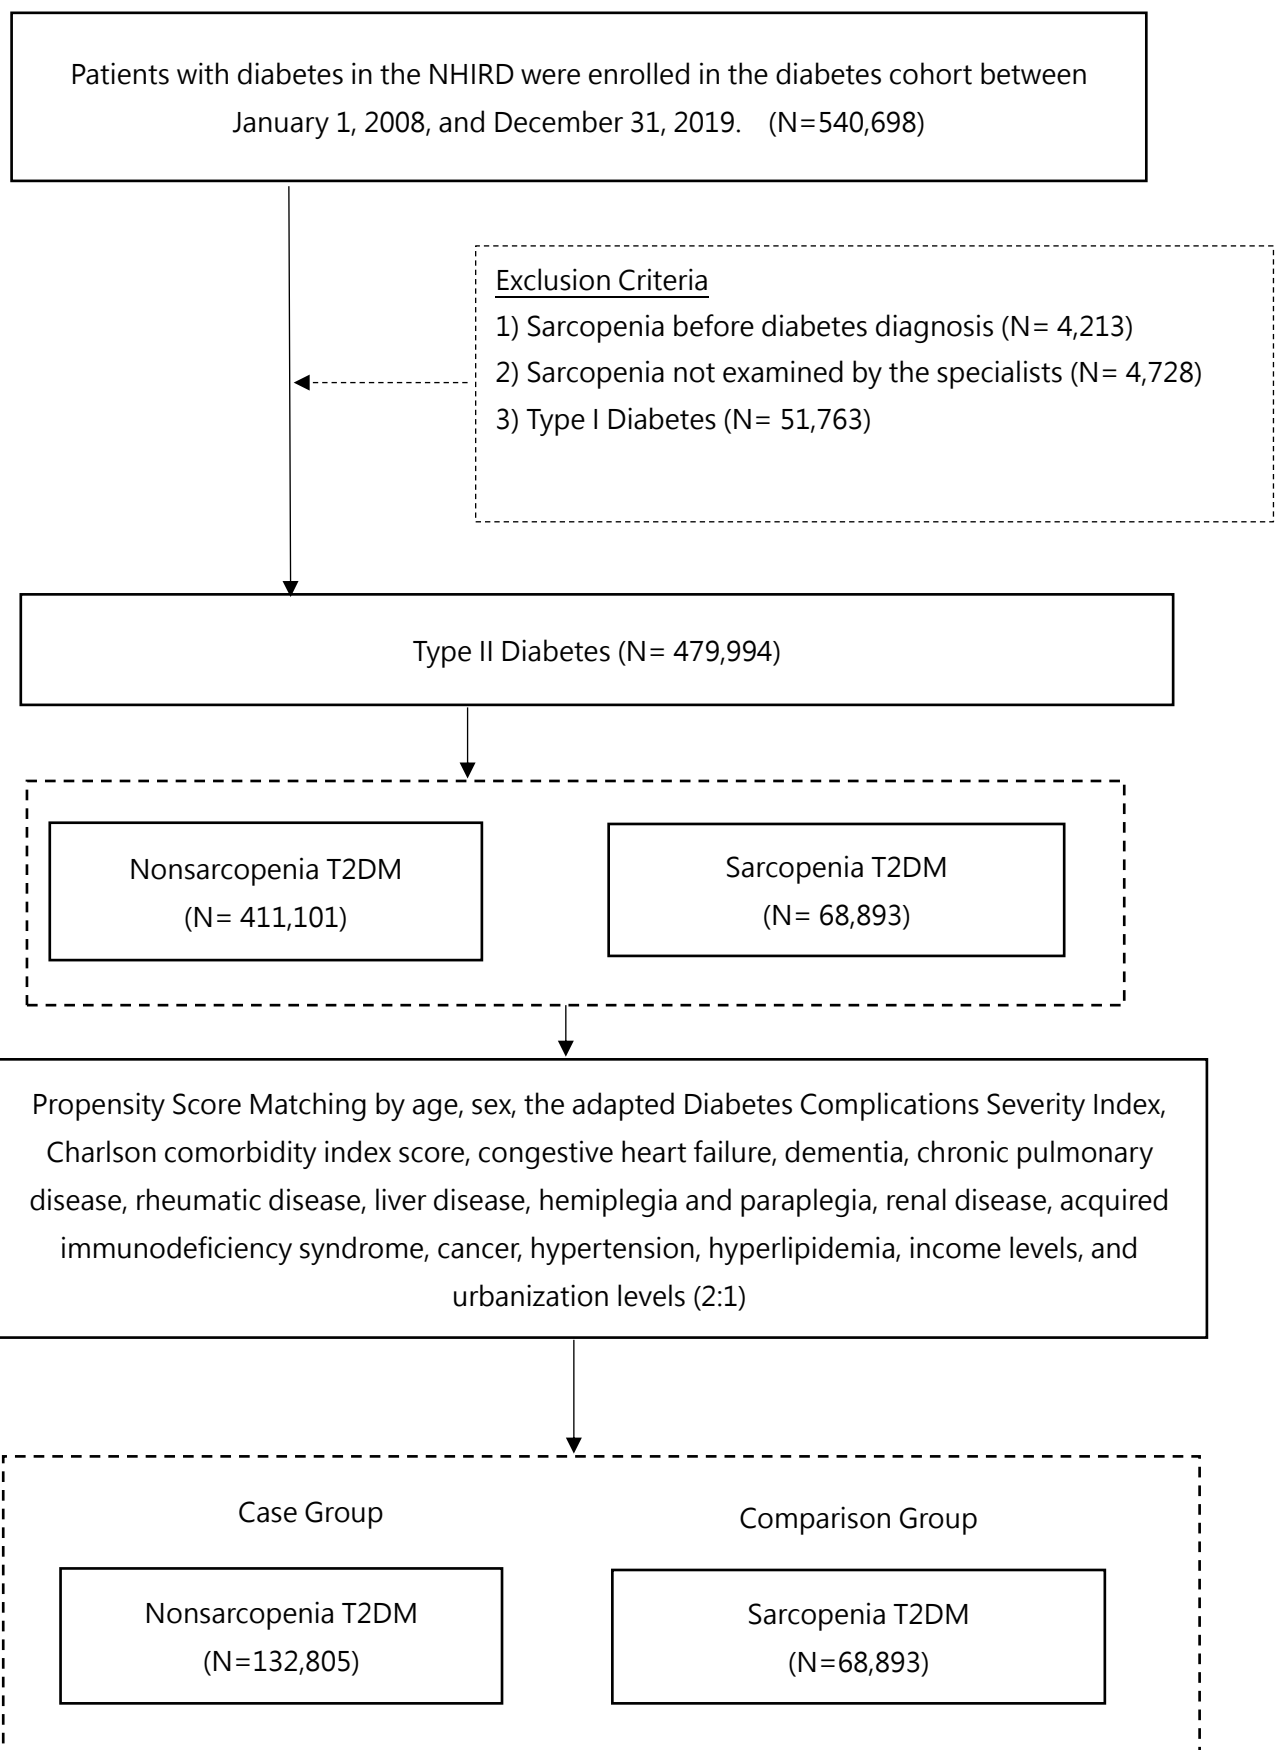

Supplement: s1 [file s1]
